# Robustness of early warning signals for catastrophic and non-catastrophic transitions

Partha Sharathi Dutta<sup>1\*</sup>, Yogita Sharma<sup>1</sup>, and Karen C. Abbott<sup>2</sup>

<sup>1</sup> Department of Mathematics  
Indian Institute of Technology Ropar  
Rupnagar, Punjab 140 001 India

\*Corresponding author: *parthasharathi@iitrpr.ac.in*

<sup>2</sup> Department of Biology  
Case Western Reserve University  
10900 Euclid Avenue  
Cleveland, OH 44106 U.S.A

## 1 **Abstract**

2 Early warning signals (EWS) are statistical indicators that a rapid regime shift may be  
3 forthcoming. Their development has given ecologists hope of predicting rapid regime shifts  
4 before they occur. Accurate predictions, however, rely on the signals being appropriate to  
5 the system in question. Most of the EWS commonly applied in ecology have been studied  
6 in the context of one specific type of regime shift (the type brought on by a saddle-node  
7 bifurcation, at which one stable equilibrium point collides with an unstable equilibrium and  
8 disappears) under one particular perturbation scheme (temporally uncorrelated noise that  
9 perturbs the net population growth rate in a density independent way). Whether and when  
10 these EWS can be applied to other ecological situations remains relatively unknown, and  
11 certainly underappreciated. We study a range of models with different types of dynamical  
12 transitions (including rapid regime shifts) and several perturbation schemes  
13 (density-dependent uncorrelated or temporally-correlated noise) and test the ability of  
14 EWS to warn of an approaching transition. We also test the sensitivity of our results to  
15 the amount of available pre-transition data and various decisions that must be made in the  
16 analysis (i.e. the rolling window size and smoothing bandwidth used to compute the EWS).  
17 We find that EWS generally work well to signal an impending saddle-node bifurcation,  
18 regardless of the autocorrelation or intensity of the noise. However, EWS do not reliably  
19 appear as expected for other types of transition. EWS were often very sensitive to the  
20 length of the pre-transition time series analyzed, and usually less sensitive to other  
21 decisions. We conclude that the EWS perform well for saddle-node bifurcation in a range  
22 of noise environments, but different methods should be used to predict other types of  
23 regime shifts. As a consequence, knowledge of the mechanism behind a possible regime  
24 shift is needed before EWS can be used to predict it.

25 *Keywords:* regime shifts, critical transitions, early warning signals, alternative stable  
26 states, stochasticity, colored noise

## 27 Introduction

28 Absent any large and sudden perturbations, we do not typically expect ecosystems to  
29 exhibit large and sudden changes in their state. Exceptions to this rule are the subject of  
30 major concern because they represent the alarming situation where small external changes  
31 create dramatic shifts in the composition, configuration, and possibly function of an  
32 ecosystem (Holling 1973, Scheffer 2009). Such sudden regime shifts can occur in two main  
33 ways (Shea et al 2004). First, a small perturbation to a parameter, such as a demographic  
34 rate or interaction term, may cause a system to cross a bifurcation point – a critical point  
35 beyond which the qualitative dynamics of the system change. Second, a small perturbation  
36 to the system state may push a system with multiple stable configurations into the basin of  
37 attraction of a different stable state. In either case, the small external changes that trigger  
38 the shift are effectively cryptic and recognizing when a particular system is at risk of  
39 suddenly shifting to a different regime is a formidable challenge.

40 A growing body of research on early warning signals (EWS) has recently been  
41 developed to meet this challenge. EWS are statistics associated with the detection of rapid  
42 regime shifts before they occur. EWS have been developed for a diverse range of dynamical  
43 scenarios, e.g. critical transitions in ecosystems (Scheffer et al 2009), onset of neuron  
44 spiking (Meisel et al 2015), rate-induced tipping in climate system (Ashwin et al 2012,  
45 Ritchie and Sieber 2016, 2017), and transitions in non-stationary models (Kwasniok 2015)  
46 and networks (Mheen et al 2013, Kuehn et al 2015). However, EWS in ecology have mostly  
47 been used to detect a specific type of regime shifts where the current state of a system is  
48 one of two stable states, and where incremental external changes will soon cause the  
49 system to cross a bifurcation (specifically a saddle node, also known as a fold, bifurcation)  
50 where the current state and an unstable equilibrium point merge and disappear. Loss of  
51 the current stable state will force the system to shift to the other stable state. A stable  
52 equilibrium is characterized by a positive rate of return following a local perturbation, and  
53 this rate approaches zero as the system nears a bifurcation at which the equilibrium

54 vanishes or loses stability (Wissel 1984). This phenomenon in which return rates approach  
55 zero, known as critical slowing down (Strogatz 1994, Van Nes and Scheffer 2007), has  
56 certain generic effects on dynamics like increased variance and autocorrelation near  
57 bifurcations; we therefore expect to see these effects when the current state of a system is  
58 about to cease being stable (Scheffer et al 2009, Held and Kleinen 2004, Brock and  
59 Carpenter 2006, Carpenter and Brock 2006, Kleinen et al 2003, Guttal and Jayaprakash  
60 2008, Seekell et al 2011). Although EWS have been successfully applied in some cases  
61 (Scheffer et al 2009), a thorough understanding of when and how they work reliably is still  
62 an open area of research (Boettiger and Hastings 2012b, Drake 2013, Boettiger and  
63 Hastings 2013, Boettiger et al 2013, Dakos et al 2015, Gsell et al 2016).

64 As eloquently mapped out in Boettiger et al (2013), rapid regime shifts may or may  
65 not involve bifurcations, and bifurcations may occur with or without critical slowing down  
66 (CSD). Because EWS are generic symptoms of CSD, rather than being indicators of regime  
67 shifts per se (Van Nes and Scheffer 2007, Kéfi et al 2012), they tend to work well when  
68 regime shifts and CSD co-occur. This is the situation with some catastrophic bifurcations  
69 (“catastrophic” meaning those with a large qualitative effect not readily reversed) like the  
70 saddle node. However, when (a) regime shifts occur without CSD, or (b) CSD occurs  
71 without an associated regime shift, EWS become more difficult to interpret. Situation (a)  
72 arises for catastrophic bifurcations that lack CSD (e.g. Hastings and Wysham 2010,  
73 Schreiber and Rudolf 2008) or when regime shifts are due to stochastic switching between  
74 coexisting stable states in the absence of any external change that would trigger CSD (e.g.  
75 Boettiger and Hastings 2012a, Sharma et al 2015). For these transitions, EWS are not  
76 expected (Hastings and Wysham 2010, Boettiger and Hastings 2013). Situation (b) occurs  
77 for non-catastrophic transitions like super-critical Hopf, transcritical, and pitchfork  
78 bifurcations, that have CSD but are characterized by quantitatively similar dynamics  
79 before and after bifurcation. For example, on one side of a super-critical Hopf bifurcation is  
80 a stable node and on the other side is a limit cycle, initially very small, that is centered

81 around that node. Although there is a meaningful qualitative change of dynamics at the  
82 bifurcation (transition from a point equilibrium to a cycle), the actual change in  
83 population densities or ecosystem state at the bifurcation point is trivial. Larger cycles  
84 farther past the bifurcation point can certainly be ecologically important, but the key here  
85 is that at the bifurcation point itself, there is no meaningful regime shift. Nevertheless,  
86 because these bifurcations occur with CSD, EWS can appear (Kéfi et al 2012).

87 In addition to transition type – catastrophic or not, with or without a bifurcation or  
88 CSD – there are important open questions about how noise type affects the performance of  
89 EWS (Contamin and Ellison 2009). The “slowing down” of CSD refers to a system’s rate  
90 of recovery following a perturbation. EWS thus only appear because perturbations are  
91 present, and these are usually in the form of stochastic noise. The properties of this noise  
92 are likely to have an effect on statistics like population variance and autocorrelation. For  
93 instance, positively autocorrelated (red-shifted) noise can have a substantial impact on  
94 population dynamics (Ripa and Lundberg 1996, and others), and how this effect interacts  
95 with the changes in population variance and autocorrelation caused by critical slowing  
96 down is not fully understood. Rudnick and Davis (2003) found that noise color strongly  
97 influenced the performance of a regime shift indicator in purely stochastic time series, but  
98 neither Perretti and Munch (2012) nor Boerlijst et al (2013) saw an effect of noise color on  
99 the performance of EWS in stochastic population models. This led Perretti and Munch  
100 (2012) to hypothesize that noise color may have a stronger effect on EWS when population  
101 dynamics are more strongly influenced by noise, but to our knowledge this idea has never  
102 been tested. Higher noise intensity could cause population dynamics to be more strongly  
103 influenced by noise, but so too could CSD itself, where a slower recovery from perturbation  
104 means weaker intrinsic regulation. A clearer understanding of if and when noise color  
105 affects the performance of EWS is needed (Boettiger and Hastings 2012a), especially given  
106 the commonness of red-shifted noise in ecological systems (Halley 1996, Vasseur and Yodzis  
107 2004). Aside from noise color, other properties, like whether perturbations cause variation

108 in parameter values, or to total or per-capita population growth rates, may also affect  
109 EWS performance (Dakos et al 2012b).

110 Finally, when computing EWS from data, researchers must make decisions about  
111 how much data before a transition to use and over what rolling window with what  
112 smoothing bandwidth. Examples have shown EWS to be sensitive to time series length  
113 (Sharma et al 2015), sampling interval (Perretti and Munch 2012), and, in some instances,  
114 bandwidth and window size (Dakos et al 2012a). However, the extent to which these  
115 individual results hold across different transition types and with different types of noise has  
116 not yet been explored.

117 In this paper, we follow Kéfi et al (2012) and compute two major early warning  
118 signals, variance and lag-1 autocorrelation, for a suite of models with different transition  
119 types. To complement Kéfi et al (2012), who used additive white (uncorrelated) noise in  
120 their models, we consider multiplicative white and red-shifted (positively autocorrelated)  
121 noise. Our models span all 5 dynamical categories delineated by Boettiger et al (2013)  
122 (redrawn in figure 1a): (I) the “charted territory” of the saddle node bifurcation, with CSD  
123 and a regime shift; and the “uncharted territories” of (II) regime shifts through  
124 bifurcations that lack CSD; (III) non-catastrophic bifurcations with CSD; (IV) CSD  
125 without a bifurcation; and (V) regime shifts due to stochastic switching, absent a  
126 bifurcation and CSD. We also computed EWS for a model undergoing a smooth and  
127 gradual state change, with no regime shift, bifurcation, or CSD, as a null case. For each  
128 model, we considered a range of time series lengths, rolling window sizes, and bandwidths  
129 in our calculations, to determine the effect of these choices on EWS performance. As  
130 expected, we find that EWS are more sensitive to time series length in comparison with  
131 window size or bandwidth within the ranges we tested. Although EWS work as expected  
132 (provided a sufficiently long time series) in the case of the saddle node bifurcation, we find  
133 both surprising positive and surprising negative results for other transition types. Because  
134 Kéfi et al (2012) did not see similar surprises when examining many of the same transitions

135 using additive white noise, we conclude that EWS performance is highly sensitive to noise  
136 type. Together, our results reemphasize the need for the mechanisms underlying a possible  
137 regime shift to be understood first, before EWS can be applied and properly interpreted  
138 (Boettiger et al 2013).

## 139 **Methods**

### 140 *Simulations*

141 We begin by reanalyzing the models studied by Kéfi et al (2012) for a different noise type  
142 (multiplicative noise, as described below). These models include a well-known example of a  
143 saddle node bifurcation (Noy-Meir 1975, May 1977, Ludwig et al 1978) (table 1 model [1],  
144 figure 1b) and a well-known model with a super-critical Hopf bifurcation (Rosenzweig  
145 1971) (table 1 model [3], figure 1d), as well as modified versions of model [1] that instead  
146 have a transcritical (table 1 [2], figure 1c) or pitchfork (table 1 [4], figure 1e) bifurcation.  
147 Also following Kéfi et al (2012), we consider model [1] with two alternative parameter  
148 settings: one in which the model lacks a transition altogether (the null case: table 1 [6],  
149 figure 1g) and one that produces an eigenvalue peak (and thus relative slowing of recovery  
150 from perturbations) but no bifurcation (table 1 [7], figure 1h). To this list, we add a model  
151 that exhibits a bifurcation and regime shift without CSD (Schreiber and Rudolf 2008)  
152 (table 1 [5], figure 1f).

153 To each of these models, we incorporated multiplicative, red-shifted Gaussian noise  
154 representing autocorrelated environmental stochasticity. The stochastic models each have  
155 the general form,

$$\frac{d\mathbf{N}}{dt} = f(\mathbf{N}) + \mathbf{N}\varepsilon(t), \quad (1)$$

156 where  $\mathbf{N}$  is population density (for one-dimensional models) or a vector of population  
157 densities,  $f(\mathbf{N})$  is the deterministic skeleton of the model as shown in table 1, and  $\varepsilon(t)$  is a  
158 random variable representing the colored noise. We refer to this formulation  
159 “multiplicative noise” because  $\varepsilon(t)$  is multiplied by a function (here, simply  $\mathbf{N}$ ) of

160 population density. Kéfi et al (2012) used a common alternative, so-called “additive noise,”  
161 in which the random variable is added to the deterministic skeleton:  $\frac{d\mathbf{N}}{dt} = f(\mathbf{N}) + \varepsilon(t)$ .  
162 Additive noise represents random perturbations whose impact is independent of population  
163 size; random density-independent immigration and emigration are examples. Multiplicative  
164 noise represents perturbations with a per-capita effect, such as random fluctuations in  
165 survivorship or fecundity.

166 We write  $\varepsilon(t)$  in Eq. (1) as an Ornstein-Uhlenbeck process with derivative,

$$\frac{d\varepsilon(t)}{dt} = -\frac{\varepsilon(t)}{\tau} + \frac{1}{\tau} \frac{\sigma}{\sqrt{2}} \xi(t), \quad (2)$$

167 where  $\xi$  is the Gaussian white noise with zero mean and unit variance,  $\sigma$  is the noise  
168 intensity, and  $\tau$  is the correlation time of the Ornstein-Uhlenbeck process. The  
169 autocorrelation function for  $\varepsilon$  is,

$$\langle \varepsilon(t), \varepsilon(t') \rangle = \frac{\sigma^2 \tau}{2} \exp\left(-\frac{|t - t'|}{\tau}\right). \quad (3)$$

170 Although we focus on red-shifted noise ( $\tau > 0$ ) in this article, we briefly also consider the  
171 case of white noise, which occurs when  $\tau \rightarrow 0$ .

172 All of these models (except for the null case, model [6]) exhibit a transition of some  
173 sort as one “control parameter” is changed within the range shown in table 1. For models  
174 [1]-[5], these transitions are different kinds of bifurcations, and for model [7] the transition  
175 is a sharp but continuous change in the state variable (figure 1f). As the control parameter  
176 is changed, regime shifts will occur for catastrophic bifurcations ([1] and [5]) and in model  
177 [7], where the transitions involve a meaningful quantitative change in state, but not for the  
178 non-catastrophic bifurcations ([2]-[4], where the transition is only qualitative) nor for [6].  
179 CSD occurs when eigenvalues approach 0, which happens when a local bifurcation is  
180 approached ([1]-[4]) or when the eigenvalue peaks sharply just below 0 ([7]; figure 1h).

181 For a fixed value of the control parameter, rapid regime shifts can also occur due to



182 stochastic switching when multiple stable equilibria are present. This happens in models  
183 [1] and [4], where 2 stable point equilibria coexist for some values of the control parameter,  
184 and in [5] where the upper point equilibrium coexists with a lower limit cycle (Schreiber  
185 and Rudolf 2008) (figure 1b,e,f).

186 For each model, we performed stochastic simulations in MATLAB (R2011a) using  
187 the Euler-Maruyama method (Higham 2001) with standard integration step size of 0.001.  
188 We chose to study these models via simulation, both to mimic the way time series data are  
189 analyzed and to allow consistent treatment of the 1-dimensional models (for which one  
190 could study the dynamics by deriving and solving the master equation (Hänggi and Jung  
191 1995)) and models with higher dimension. Where our suite of models overlaps with Kéfi  
192 et al (2012), we used the same parameter values as they did to facilitate comparison. To  
193 examine transitions due to changes in the control parameter, we fixed all other parameters  
194 at the values shown in table 1 and simulated the model while gradually changing the  
195 control parameter across the range shown over 1000 time units. To examine stochastic  
196 switching, we fixed the control parameter at the value given in parentheses in table 1.

197 We simulated all models across a range of red-shifted noise environments by using  
198 various combinations of  $\sigma$  and  $\tau$ , as given in the “Ranges” columns of table 2. We then  
199 followed up with one specific  $\sigma - \tau$  combination for each model (“Fixed values” in table 2)  
200 for an in-depth comparison of the different window sizes, time series lengths, and  
201 bandwidths.

202 Finally, because our results under multiplicative red-shifted noise differ notably  
203 from those of Kéfi et al (2012) under additive white noise, we repeated our analysis using  
204 multiplicative white noise (i.e. equation (1) with temporally uncorrelated  $\varepsilon(t)$ ,  $\tau \rightarrow 0$ ).  
205 This allows us to assess the effect of red-shifted noise independently from our use of  
206 multiplicative perturbations.

**Table 1.** Deterministic base models, parameters descriptions, and values used. For each model, the control parameter is shown with a range of values. To move the system across the bifurcation or other transition point, we gradually varied the control parameter across this range. To explore stochastic switching, we fixed all parameters including the control parameter; the fixed value used for the control parameter is shown in parentheses.

| Deterministic skeleton                                                                                                                                                                                                    | Parameters                              | Values       |
|---------------------------------------------------------------------------------------------------------------------------------------------------------------------------------------------------------------------------|-----------------------------------------|--------------|
| [1] Saddle node (fold) bifurcation:<br>$\frac{dN}{dt} = rN \left(1 - \frac{N}{K}\right) - \frac{cN^2}{b^2+N^2}$                                                                                                           | $K$ - carrying capacity                 | 10           |
|                                                                                                                                                                                                                           | $r$ - maximum growth rate               | 1            |
|                                                                                                                                                                                                                           | $c$ - maximum grazing rate              | 1–3 (2)      |
|                                                                                                                                                                                                                           | $b$ - half saturation constant          | 1            |
| [2] Transcritical bifurcation:<br>$\frac{dN}{dt} = rN \left(1 - \frac{N}{K}\right) - cN$                                                                                                                                  | $K$ - carrying capacity                 | 10           |
|                                                                                                                                                                                                                           | $r$ - maximum growth rate               | 1            |
|                                                                                                                                                                                                                           | $c$ - maximum grazing rate              | 0–2          |
| [3] Super-critical Hopf bifurcation:<br>$\frac{dN}{dt} = rN \left(1 - \frac{N}{K}\right) - \frac{aNP}{b+N}$<br>$\frac{dP}{dt} = \frac{eaNP}{b+N} - dP$                                                                    | $K$ - carrying capacity of resource     | 0.1–4        |
|                                                                                                                                                                                                                           | $r$ - maximum growth rate of resource   | 0.5          |
|                                                                                                                                                                                                                           | $a$ - maximum grazing rate              | 0.4          |
|                                                                                                                                                                                                                           | $b$ - half saturation constant          | 0.6          |
|                                                                                                                                                                                                                           | $e$ - assimilation efficiency of grazer | 0.6          |
|                                                                                                                                                                                                                           | $d$ - mortality rate of grazer          | 0.15         |
| [4] Pitchfork bifurcation:<br>$\frac{dN}{dt} = rN \left(1 - \frac{N}{K}\right) (N - N_c) - cN + I$                                                                                                                        | $K$ - carrying capacity                 | 10           |
|                                                                                                                                                                                                                           | $r$ - maximum growth rate               | 0.1–1 (0.4)  |
|                                                                                                                                                                                                                           | $c$ - maximum grazing rate              | 0.8          |
|                                                                                                                                                                                                                           | $N_c$ - Allee threshold                 | 5            |
|                                                                                                                                                                                                                           | $I$ - immigration rate                  | 4            |
| [5] Bifurcation without CSD:<br>$\frac{dR_i}{dt} = rR_i \left(1 - \frac{R_i}{K_i}\right) - a_i R_i C_i$ ( $i=J, A$ )<br>$\frac{dC_J}{dt} = ea_A R_A C_A - dC_J - ea_J R_J C_J$<br>$\frac{dC_A}{dt} = ea_J R_J C_J - dC_A$ | $r$ - intrinsic growth rate             | 1            |
|                                                                                                                                                                                                                           | $d$ - mortality rate                    | 0.1          |
|                                                                                                                                                                                                                           | $a_J$ - juvenile attack rate            | 0.01         |
|                                                                                                                                                                                                                           | $a_A$ - adult attack rate               | 0.01         |
|                                                                                                                                                                                                                           | $e$ - energy conversion efficiency      | 0.4          |
|                                                                                                                                                                                                                           | $K_J$ - juvenile carrying capacity      | 110          |
|                                                                                                                                                                                                                           | $K_A$ - adult carrying capacity         | 50–200 (156) |
| [6] No transition:<br>$\frac{dN}{dt} = rN \left(1 - \frac{N}{K}\right) - \frac{cN^2}{b^2+N^2}$                                                                                                                            | $K$ - carrying capacity                 | 1.9          |
|                                                                                                                                                                                                                           | $r$ - maximum growth rate               | 1            |
|                                                                                                                                                                                                                           | $c$ - maximum grazing rate              | 1–3          |
|                                                                                                                                                                                                                           | $b$ - half saturation constant          | 1            |
| [7] Sharp transition without bifurcation:<br>$\frac{dN}{dt} = rN \left(1 - \frac{N}{K}\right) - \frac{cN^2}{b^2+N^2}$                                                                                                     | $K$ - carrying capacity                 | 5.2          |
|                                                                                                                                                                                                                           | $r$ - maximum growth rate               | 1            |
|                                                                                                                                                                                                                           | $c$ - maximum grazing rate              | 1–3          |
|                                                                                                                                                                                                                           | $b$ - half saturation constant          | 1            |

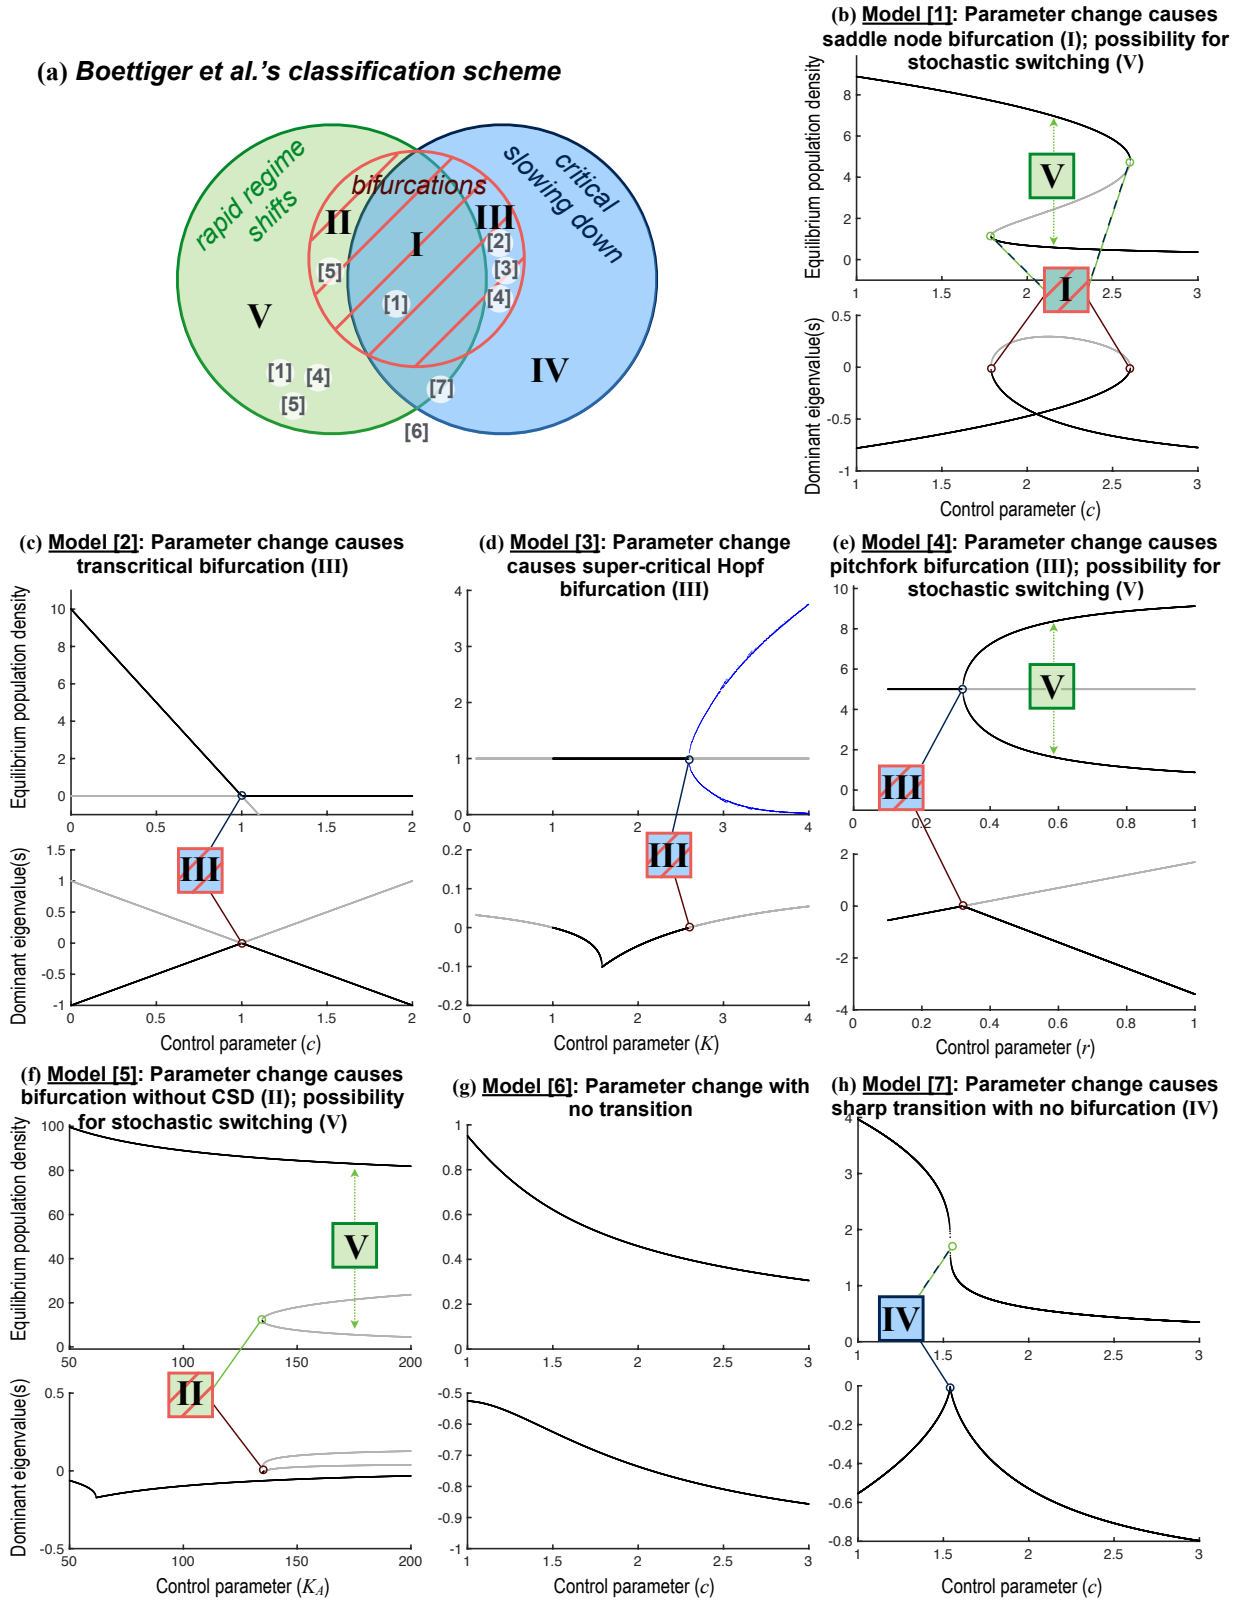

Figure 1

207 **Figure 1 caption:** (a) Venn diagram, redrawn and slightly modified from Boettiger et al (2013), showing  
 208 possible combinations of critical slowing down, rapid regime shifts, and bifurcations. Roman numerals label  
 209 the 5 distinct combinations, as laid out in Boettiger et al (2013); we modified region IV slightly to include  
 210 any case of critical slowing down that occurs in the absence of a bifurcation (regardless of whether or not a  
 211 rapid regime shift also occurs; this allows us to place the sharp transition in (h) cleanly into region IV  
 212 without debating whether the transition truly qualifies as a rapid regime shift). Numbers in square  
 213 brackets correspond to the model numbers used in table 1 and throughout, showing where each model fits  
 214 within this classification scheme. (b-h) Bifurcation diagrams and dominant eigenvalues (real part) for each  
 215 model and parameter set shown in table 1. Stable equilibria (upper graph in each pair) and their dominant  
 216 eigenvalues (lower graph) are plotted in black; unstable equilibria and their dominant eigenvalues are  
 217 plotted in gray. Transitions are labeled using the roman numerals from (a). Beyond the super-critical Hopf  
 218 bifurcation in model [3] (panel (d)), we show the amplitude of limit cycles in blue. **Bifurcations** occur in  
 219 panels (b)-(f) where eigenvalues intersect 0. **Critical slowing down** occurs as the bifurcation is  
 220 approached in (b)-(e), and when the eigenvalue peaks sharply just below 0 in (h). **Rapid regime shifts**  
 221 are possible due to changes in the control parameter in (b), (f), and (h), where the state before and after  
 222 transition is quite different. Rapid regime shifts can also occur due to stochastic switching in (b) and (e)  
 223 where 2 stable point equilibria coexist for a given value of the control parameter, and in (f) where the  
 224 upper point equilibrium coexists with a limit cycle around the lowest unstable equilibrium (Schreiber and  
 225 Rudolf 2008).  
 226

**Table 2.** Values of  $\tau$  and  $\sigma$  used.  $\Delta$ Param refers to simulations where the control parameter was changed to drive transitions and Stoch refers to simulations of stochastic switching. We ran each model under approximately 400 combinations of  $\sigma$  and  $\tau$  chosen to span the range of behaviors observed in the parameter ranges given; these results are reported in aggregate as histograms. Specific examples we studied use the fixed values given in the last 2 columns.

| Model | Cause of transition | Ranges                      |              | Fixed values         |        |
|-------|---------------------|-----------------------------|--------------|----------------------|--------|
|       |                     | $\sigma$                    | $\tau$       | $\sigma$             | $\tau$ |
| [1]   | $\Delta$ Param      | $[3, 5] \times 10^{-5}$     | [0.01, 0.03] | $3 \times 10^{-5}$   | 0.01   |
| [1]   | Stoch               | $[5, 9] \times 10^{-4}$     | [0.01, 0.03] | $5 \times 10^{-5}$   | 0.01   |
| [2]   | $\Delta$ Param      | $(0, 8] \times 10^{-4}$     | [0.1, 1.9]   | $4 \times 10^{-4}$   | 1      |
| [3]   | $\Delta$ Param      | $[1, 9] \times 10^{-4}$     | [0.1, 0.3]   | $5 \times 10^{-4}$   | 0.1    |
| [4]   | $\Delta$ Param      | $[4, 8] \times 10^{-5}$     | [0.1, 0.3]   | $6 \times 10^{-5}$   | 0.1    |
| [4]   | Stoch               | $[1.4, 1.6] \times 10^{-4}$ | [0.1, 0.3]   | $1.5 \times 10^{-4}$ | 0.1    |
| [5]   | $\Delta$ Param      | $[3, 5] \times 10^{-3}$     | [0.1, 0.3]   | $4.2 \times 10^{-3}$ | 0.1    |
| [5]   | Stoch               | $[6, 8] \times 10^{-3}$     | [0.01, 0.03] | $7 \times 10^{-3}$   | 0.01   |
| [6]   | $\Delta$ Param      | $[2, 4] \times 10^{-5}$     | [0.01, 0.03] | $3 \times 10^{-5}$   | 0.01   |
| [7]   | $\Delta$ Param      | $[0.1, 1] \times 10^{-3}$   | [0.1, 0.3]   | $1 \times 10^{-4}$   | 0.1    |

## 227 *Measuring EWS of catastrophic and non-catastrophic transitions*

228 We used the Early Warning Signal toolbox (<http://www.early-warning-signals.org/>) to  
229 calculate two EWS, variance and lag-1 autocorrelation, from our simulated time series. For  
230 each time series, we assessed whether the EWS rose in advance of the transition using  
231 Kendall's- $\tau$ , which measures the rank correlation between EWS values and time (as in  
232 Dakos et al 2012a). We rejected the null hypothesis of no EWS rise if the computed  
233 Kendall's- $\tau$  statistic for a particular simulated time series had a  $p$ -value  $\leq 0.05$ . EWS  
234 should be interpreted as signaling an impending transition if *both* variance and  
235 autocorrelation rise (Ditlevsen and Johnsen 2010). For model [6], there is no transition  
236 and thus no natural point in the time series for us to check for a rise in EWS. For this  
237 model, we checked for EWS rise before an arbitrarily chosen time point midway through  
238 the simulated time series.

239 The variance and autocorrelation are calculated within a rolling window, and we  
240 repeated the EWS calculation for 3 different window sizes with lengths equal to 30%, 50%,  
241 70% the size of the available time series. We also considered 3 different time series lengths:  
242 the longest possible interval before a transition, and intervals equal to one half and one  
243 quarter that length. The Early Warning Signals toolbox uses Gaussian kernel smoothing to  
244 detrend the time series, and we adjusted the degree of smoothing by considering 3 different  
245 bandwidths (5, 30, and 60). For all analyses, we used time series that consisted of 1  
246 observation per time unit ( $t = 0, 1, 2, 3, \dots$ ).

## 247 **Results**

### 248 *EWS for models with colored noise ( $\tau > 0$ )*

249 When transitions were due to changes in the control parameters, our models varied greatly  
250 in their propensity to show EWS before a shift. Variance and autocorrelation both rose  
251 consistently in advance of the saddle node bifurcation (model [1]), the bifurcation that  
252 lacked CSD (model [5]), and often, but not always, the sharp transition without a

253 bifurcation (model [7]) (figure 2). Autocorrelation, but not variance, consistently rose in  
 254 model [2], with the transcritical bifurcation, and the opposite was true of model [3]  
 255 (super-critical Hopf). In all other cases, EWS rose in half or less of the simulated  $\sigma, \tau$   
 256 combinations. As expected, this includes our null case (model [6]) and all cases of  
 257 stochastic switching (figure 2).

258 The method of calculating EWS had some impact on our results (figures 3-4, table  
 259 3). In particular, we found that EWS generally rose more reliably in advance of a  
 260 transition when we used a longer time series leading up to that transition (figure 3c-d).  
 261 Rolling window size (figure 4a) and smoothing bandwidth (figure 4b) had less effect on the  
 262 EWS (table 3) in comparison with the time series length, across the ranges we considered.

263 Examples (based on parameter values shown in tables 1-2) of the simulated time  
 264 series and the behavior of the EWS are shown in figures 3-5 and summarized in table 3.  
 265 These examples again show clear rises in both EWS for models [1] and [5], and mixed  
 266 results for the other models (including, for this set of  $\sigma$  and  $\tau$  values, model [7]).

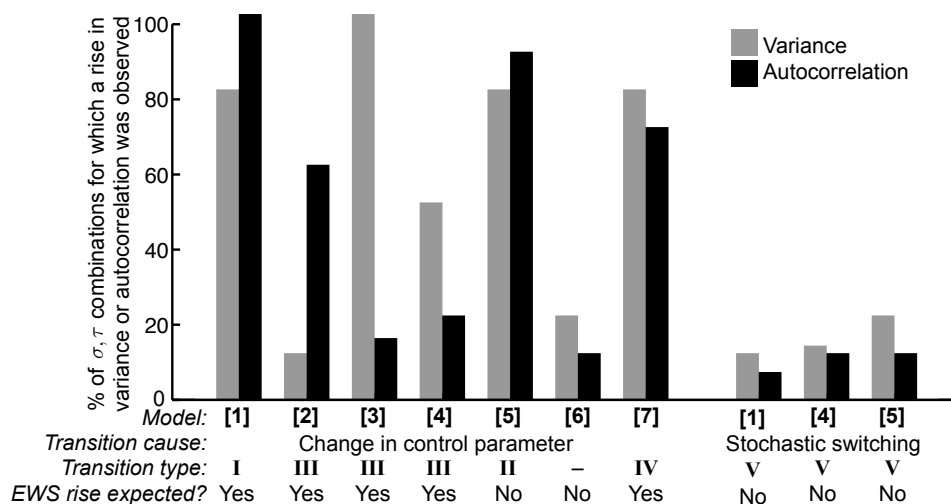

**Figure 2.** Histograms showing the percentage of colored noise simulations that showed a rise in variance or autocorrelation before a transition. Each model was simulated using the parameter values shown in table 1 across many combinations of  $\tau$  and  $\sigma$ , as explained in the text. EWS were calculated using the longest possible pre-transition time series, a rolling window size of 50% the time series length, and a smoothing bandwidth of 40.

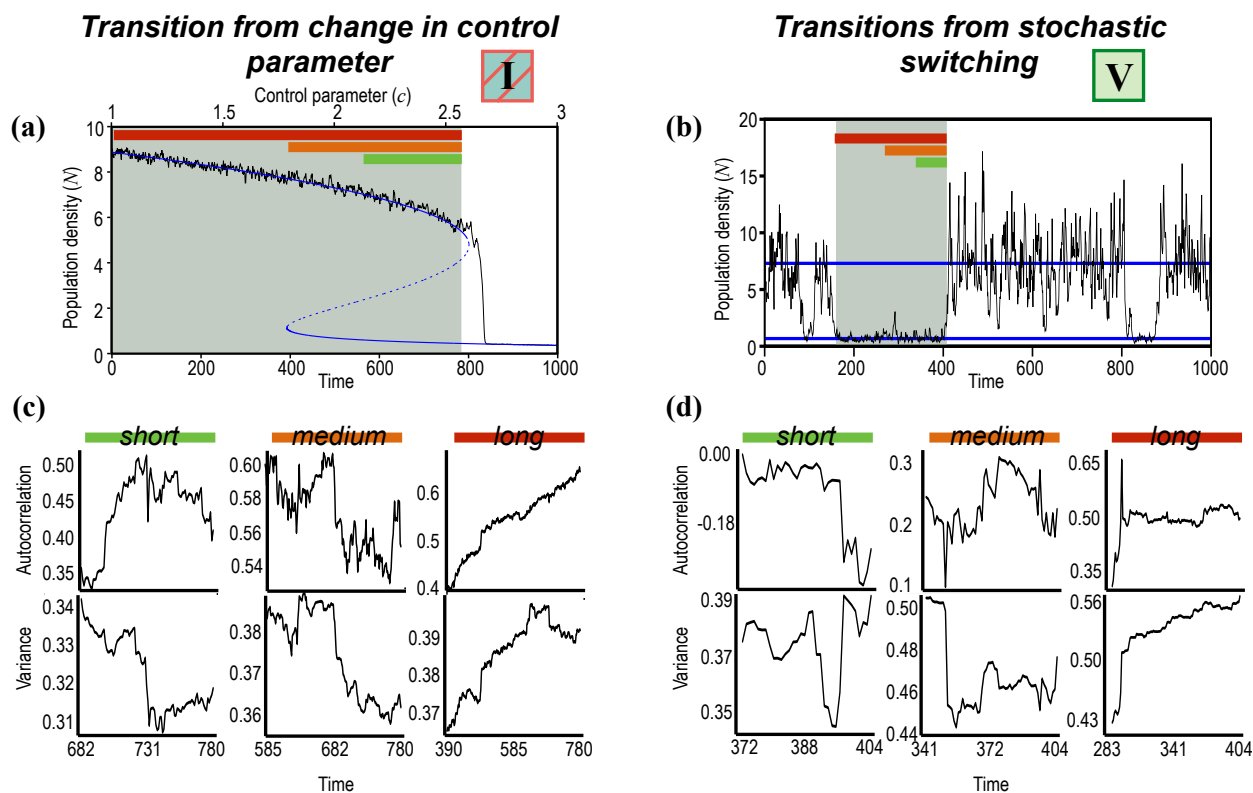

**Figure 3.** EWS for model [1]. The left column (a,c) considers transitions that are driven by change in the control parameter, and the right column (b,d) considers stochastic switching. (a-b): Simulated time series (black lines) plotted with stable (solid blue lines) and unstable (dashed blue lines) equilibria. The gray shaded area marks the longest time series that is available for analysis preceding a shift. (c-d): EWS calculated from 3 different time series lengths, equal to the last 25%, 50%, or 100% of the gray shaded time series (spans marked, respectively, with green, orange, and red bars in (a-b)). All model parameters are as shown in tables 1-2; (c-d) use a window size of 50% the time series length and bandwidth 5.

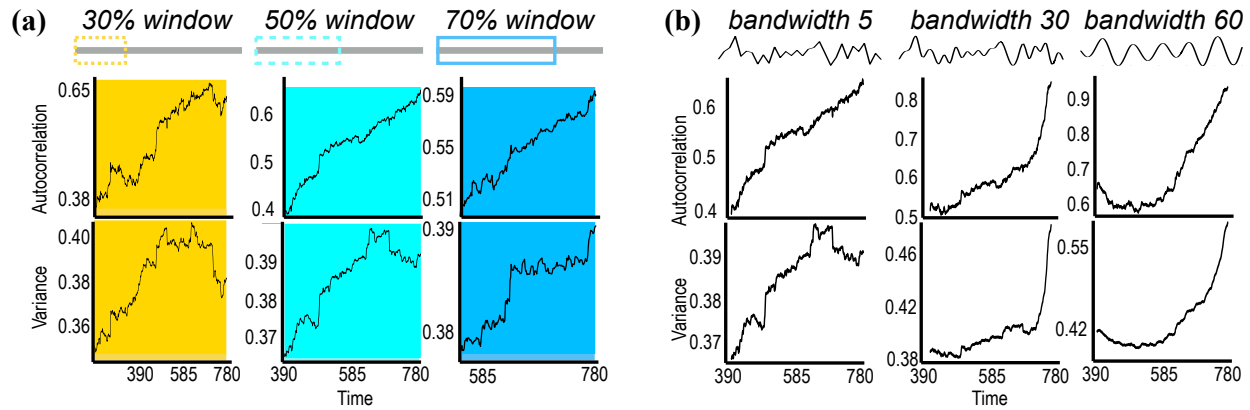

**Figure 4.** Sensitivity of EWS to window size and smoothing bandwidth for model [1] with a change in the control parameter (time series shown in figure 3a). (a) EWS calculated with 3 different rolling window sizes, of lengths equal to 30%, 50%, and 70% the length of the time series being analyzed. (b) EWS calculated using 3 different bandwidths: 5, 30, and 60. All model parameters are as shown in tables 1-2. The longest time series available (entire shaded region in figure 3a) was used; (a) uses bandwidth 5 and (b) uses a window size of 50% the time series length.



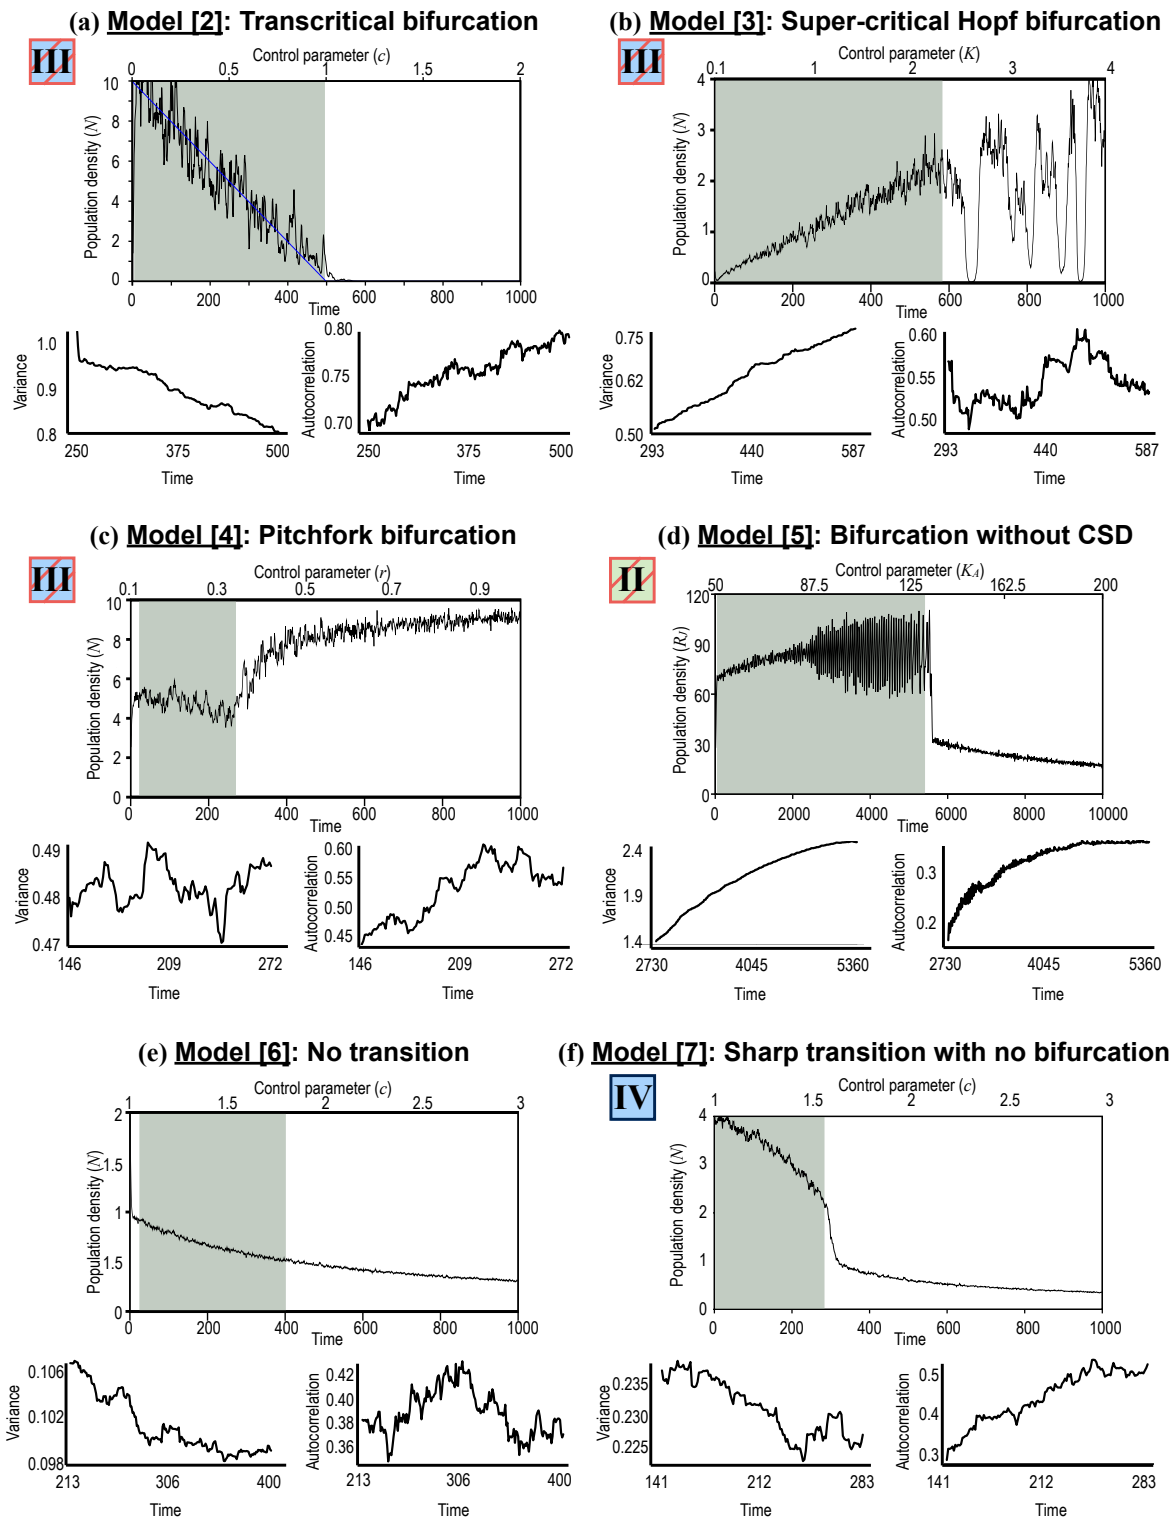

**Figure 5.** EWS for models [2]-[7] in cases where transitions are driven by changes in the control parameters. The gray shaded area shows the time series analyzed, and all results shown here used a rolling window of 50% the time series length and a bandwidth of 5. All model parameters are as shown in tables 1-2.

**Table 3.** Summary of results under fixed values of  $\sigma$  and  $\tau$  (right columns of table 2). Model equations can be found in Table 1. For each model, there are up to 2 possible causes for transitions: a change in parameter values ( $\Delta$ Param) or stochastic switching (Stoch). For each transition, we list the classification according to figure 1a and specify which phenomena are present (Bif = bifurcation; RRS = rapid regime shifts; CSD = critical slowing down). We state whether the early warning signals (EWS: variance (Var.) and lag-1 autocorrelation (AC)) consistently rises in advance of the transition, based on analysis of the longest possible pre-shift time series, a rolling window of 50% the time series length, and a bandwidth of 5. Lastly, we report whether these are sensitive to window size (window), time series length (length), or bandwidth (bandw). Other abbreviations: transcr = transcritical, pitch = pitchfork.

| Model | Cause of transition | Bif?        | RRS? | CSD? | <i>EWS rise?</i> |     | <i>EWS sensitive to:</i> |        |       |
|-------|---------------------|-------------|------|------|------------------|-----|--------------------------|--------|-------|
|       |                     |             |      |      | Var.             | AC  | window                   | length | bandw |
| [1]   | $\Delta$ Param(I)   | Yes–fold    | Yes  | Yes  | Yes              | Yes | No                       | Yes    | No    |
|       | Stoch(V)            | No          | Yes  | No   | No               | No  | Yes                      | Yes    | No    |
| [2]   | $\Delta$ Param(III) | Yes–transcr | No   | Yes  | No               | Yes | No                       | No     | No    |
| [3]   | $\Delta$ Param(III) | Yes–Hopf    | No   | Yes  | Yes              | No  | No                       | No     | No    |
| [4]   | $\Delta$ Param(III) | Yes–pitch   | No   | Yes  | No               | No  | No                       | No     | No    |
|       | Stoch(V)            | No          | Yes  | No   | No               | No  | No                       | Yes    | No    |
| [5]   | $\Delta$ Param(II)  | Yes         | Yes  | No   | Yes              | Yes | No                       | Yes    | No    |
|       | Stoch(V)            | No          | Yes  | No   | No               | No  | No                       | No     | No    |
| [6]   | $\Delta$ Param      | No          | No   | Yes  | No               | No  | No                       | Yes    | No    |
| [7]   | $\Delta$ Param(VI)  | No          | Yes  | Yes  | No               | Yes | Yes                      | Yes    | Yes   |

267 *EWS for models with white noise ( $\tau \rightarrow 0$ )*

268 When we simulated each model with multiplicative white noise (equations (1)-(2) with  
 269  $\tau \rightarrow 0$ ), both variance and autocorrelation usually rose in advance of a transition caused by  
 270 a parameter change (figure 6). This was true regardless of whether CSD was present (in  
 271 which case we expect both signals to rise; models [1]-[4], [7]) or not (model [5]). Our null  
 272 model [6] showed a rise in both signals, and especially variance, in a surprisingly large  
 273 number of cases, give that this model has no transition. EWS again typically did not rise  
 274 before stochastic switching (figure 6). Figure 7 provides a comparison of our results (for  
 275 multiplicative red and multiplicative white noise) and those of Kéfi et al (2012) (for  
 276 additive white noise).

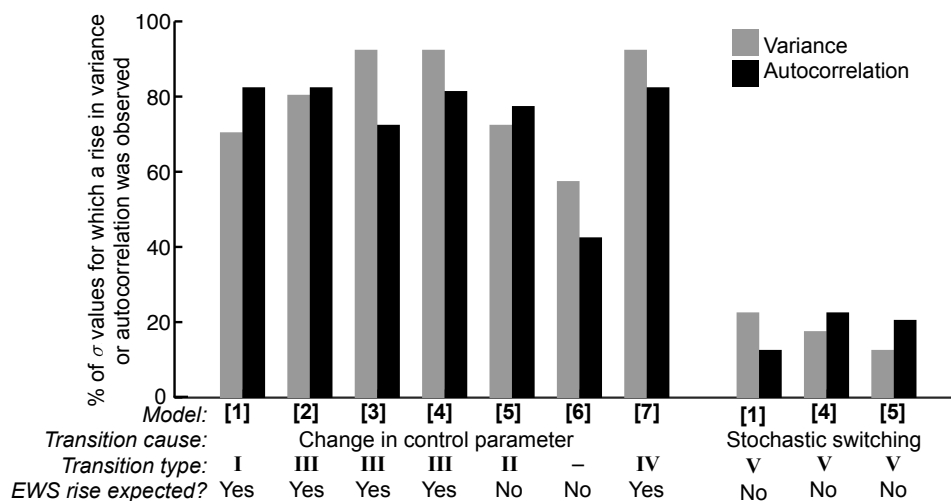

**Figure 6.** Histograms showing the percentage of simulations that showed a rise in variance or autocorrelation before a transition when models were simulated under multiplicative white noise. Parameter values as in figure 2.

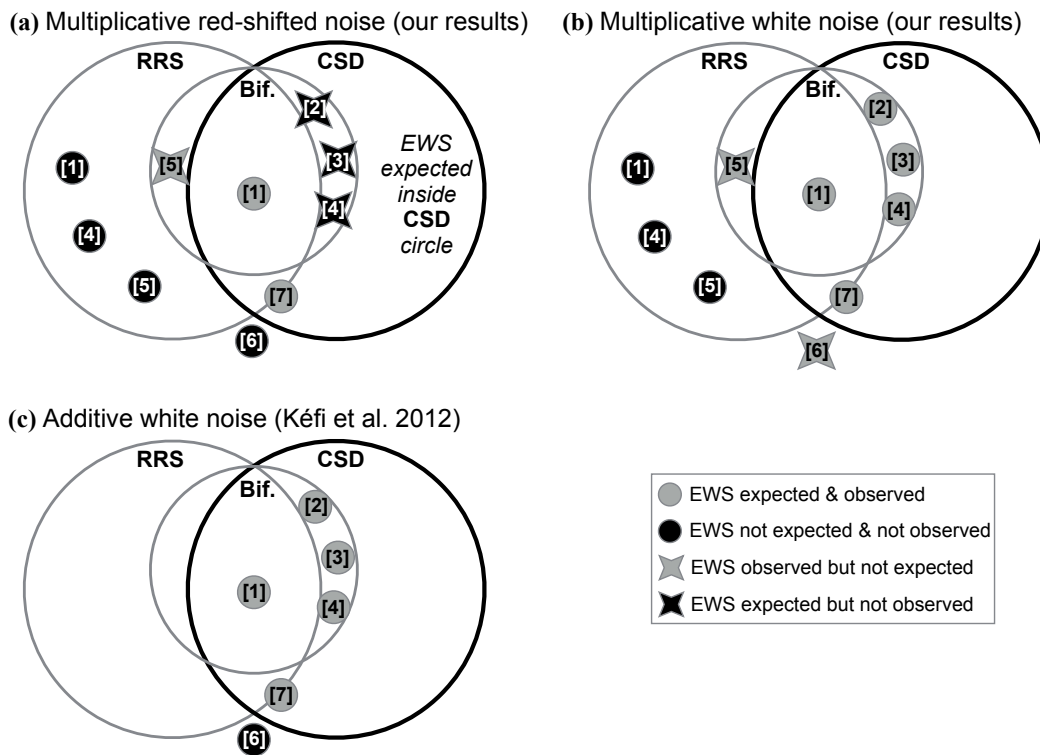

**Figure 7.** Graphical summary of all results, using the same Venn diagram as in figure 1a. (a) Our results using multiplicative colored noise; (b) our results using multiplicative white noise; (c) results reported for additive white noise in Kéfi et al (2012). For the purposes of summarizing our results, we say “EWS observed” if both variance and autocorrelation rose in  $\geq 40\%$  of  $\sigma, \tau$  combinations (panel a) or  $\sigma$  values (panel b) that we examined. Numbers in square brackets refer to model numbers. Models numbers inside dots behaved as expected: both EWS consistently rose in advance of a transition with CSD (“EWS expected”) or failed to rise in advance of a transition without CSD (“EWS not expected”). Models inside X-shaped symbols did not behave as expected. Gray shapes mark all cases where a rise in both variance and autocorrelation was observed, and black shapes mark cases where one or both signals did not consistently rise. If the EWS only behaved as expected, the CSD circle would contain only gray dots, and all shapes outside this circle would be black dots. Note that Kéfi et al (2012) did not consider our model [5] nor any cases of stochastic switching, so those points are not depicted in (c). Note also that while Kéfi et al (2012) did report EWS in model [6], they observed the EWS rise outside the range of the control parameter that we used here; therefore, we mark [6] as “EWS not observed” in (c) for a proper comparison against our results.

## 277 Discussion

278 Our analyses showed both surprising positive and surprising negative results. With  
 279 multiplicative red-shifted noise, the early warning signals appeared in advance of a  
 280 transition without critical slowing down (model [5]) and failed to appear in advance of  
 281 several transitions with CSD (models [2], [3] and [4]) (figure 7a). When we instead  
 282 modeled multiplicative white noise, the EWS rose as expected before all transitions with

283 CSD, but still frequently also rose before a non-CSD transition (again model [5]) and  
284 before an arbitrarily-chosen time point in the model that lacked a transition ([6]) (figure  
285 7b). Our results for using multiplicative white noise are in close agreement with Kéfi et al's  
286 (2012) results with additive white noise (figure 7c). Agreement between EWS in the  
287 presence of additive and multiplicative noise was also reported by Kuehn (2013). It  
288 therefore appears that the performance of EWS is more sensitive to noise color (temporal  
289 autocorrelation) than to the exact way stochasticity enters into the model.

290 Encouragingly, we found that EWS are robust indicators of an impending  
291 saddle-node (fold) bifurcation regardless of the type of noise we used. In some sense, this is  
292 unsurprising: saddle-node bifurcations fit within region I (figure 1a), which Boettiger et al  
293 (2013) referred to as the “charted territory” because the vast majority of EWS research in  
294 ecology has been conducted on models in this region. Nevertheless, even in region I, there  
295 is a general paucity of ecological studies with non-additive noise (Hastings and Wysham  
296 2010), and past reports on the effect of noise color on EWS have been mixed (Rudnick and  
297 Davis 2003, Dakos et al 2012b, Perretti and Munch 2012, Boerlijst et al 2013). EWS can  
298 fail to predict an approaching fold in some instances of anisotropic perturbations (i.e. noise  
299 that affects some components of the system more strongly than others; Boerlijst et al  
300 2013). We are not, therefore, suggesting that EWS will universally warn of fold  
301 bifurcations. Still, we find it encouraging and interesting that they worked so well under  
302 multiplicative red and white noise. While red-shifted noise obviously affects population  
303 autocorrelation, it does not appear to interfere with the *trend* in autocorrelation that  
304 signals an approaching transition due to a fold bifurcation.

305 In contrast, these EWS appear unreliable in the context of other kinds of  
306 transitions. We expected the EWS to rise in advance of any transition with CSD but for  
307 models [2]-[4], we only saw this rise for white noise. Red-shifted noise did appear to  
308 interfere with the use of autocorrelation as an EWS for models [3] and [4] (see “change in  
309 control parameter” bars, figure 2 (red noise) versus figure 6 (white noise)). However, for

310 model [2], and to a lesser extent [4], it was variance that failed to rise under red noise.  
311 When CSD was absent, and so EWS were not expected to rise, they still consistently rose  
312 for some transitions. There are two important lessons in these observations. First, EWS  
313 can rise before some transitions (or arbitrary moments, for our null model without a  
314 transition) that lack CSD. This highlights the plain fact that properties like variance and  
315 autocorrelation have many causes unrelated to critical slowing down, and that their  
316 patterns are not always driven by critical points. Second, EWS do not appear to be robust  
317 indicators of CSD in the uncharted territories of III and IV (where, of course, even if CSD  
318 is detected, it will not (III) or may not (IV) be associated with a rapid regime shift at the  
319 bifurcation point). We therefore strongly second Boettiger et al's (2013) remark that  
320 "establishing the saddle-node mechanism is a necessary condition of using [the EWS of]  
321 CSD as a warning signal." Developing strategies for identifying impending dynamical  
322 changes other than the saddle-node bifurcation is an exciting open challenge.

323 We placed stochastic switching into category V (figure 1a), as an example of a rapid  
324 regime shift that is not accompanied by a bifurcation nor CSD. Boettiger et al (2013) also  
325 used this classification, but there has been some debate about whether slowing down  
326 should be expected in some cases of stochastic switching (Boettiger and Hastings 2013,  
327 Drake 2013). Drake (2013) argued that when there is a shift between stable states  
328 separated by an unstable equilibrium, CSD should be observed as the system traverses the  
329 unstable point (at which the eigenvalue equals zero). However, we found no EWS before a  
330 stochastic switch, regardless of whether that switch crossed an intervening unstable point  
331 (models [1] and [4]) or not (model [5]). We instead found support for the idea that  
332 unstable states are traversed sufficiently quickly that no CSD appears, in agreement with  
333 theory (Boettiger and Hastings 2013, Freidlin and Wentzell 2012).

334 We found, like Dakos et al (2012a), that variance and autocorrelation are typically  
335 robust to the rolling window size and smoothing bandwidth used to compute them (table  
336 3). Both indicators were much more sensitive to the length of the pre-transition time series

337 analyzed. In most cases, using a longer time series improved EWS performance (i.e. made  
338 them more likely to rise or not as expected). However, for model [5]’s transition due to  
339 changing the control parameter, the unexpected rise in variance and autocorrelation was  
340 *only* observed in the longest time series. Thus, for model [5] the EWS would have behaved  
341 as expected if we had used less pre-transition data. The null model [6] behaved as  
342 expected for the longest and shortest time series considered, but not when we used an  
343 intermediate length. Together, these results suggest that having more data does not  
344 invariably reduce the unexpected behaviors of EWS. Even – and in some cases, especially –  
345 with long datasets, calculating EWS without first knowing that a saddle-node bifurcation  
346 exists in the system can lead to faulty conclusions.

347 We conclude that EWS performance is robust to differences in noise type in the case  
348 of the saddle-node bifurcation, for the models and (isotropic) noise types we considered.  
349 For other transitions, though, EWS did not necessarily accompany CSD, and their  
350 behavior was highly sensitive to noise type. Continued research on the development and  
351 refinement of early warning signals has rightly garnered much attention (Scheffer et al  
352 2009, Dakos et al 2012a,b); the prospect of being able to predict a catastrophic shift before  
353 it occurs is truly exciting. At the same time, any early warning signal will have bounds on  
354 its applicability (Kéfi et al 2012, Boettiger and Hastings 2012b, Dakos et al 2015, Gsell  
355 et al 2016). Research that helps us define and understand these boundaries improves our  
356 ability to properly recognize warning signals and points the way toward open areas in need  
357 of new EWS development.

### 358 **Acknowledgements**

359 PSD acknowledges financial support from ISIRD, IIT Ropar Grant No.: IITRPR/Acad./52.  
360 This work was partially supported by a Complex Systems Scholar grant to KCA from the  
361 James S. McDonnell Foundation. We thank the members of the Abbott and Snyder labs at  
362 Case Western Reserve University for extremely helpful suggestions on presentation.

363 **References**

- 364 Ashwin P, Wieczorek S, Vitolo R, Cox P (2012) Tipping points in open systems:  
365 bifurcation, noise-induced and rate-dependent examples in the climate system. *Phil*  
366 *Trans R Soc A* 370(1962):1166–1184
- 367 Boerlijst MC, Oudman T, de Roos AM (2013) Catastrophic Collapse Can Occur without  
368 Early Warning: Examples of Silent Catastrophes in Structured Ecological Models. *PLoS*  
369 *ONE* 8(4):e62,033
- 370 Boettiger C, Hastings A (2012a) Early warning signals and the prosecutor’s fallacy. *Proc R*  
371 *Soc Lond B* 279(1748):4734–4739
- 372 Boettiger C, Hastings A (2012b) Quantifying limits to detection of early warning for  
373 critical transitions. *J Roy Soc Interface* 9:1–29
- 374 Boettiger C, Hastings A (2013) No early warning signals for stochastic transitions: insights  
375 from large deviation theory. *Proc R Soc Lond B* 280(1766)
- 376 Boettiger C, Ross N, Hastings A (2013) Early warning signals: the charted and uncharted  
377 territories. *Theoretical Ecology* 6(3):255–264
- 378 Brock WA, Carpenter SR (2006) Variance as a leading indicator of regime shift in  
379 ecosystem services. *Ecol Soc* 11(2):9
- 380 Carpenter SR, Brock WA (2006) Rising variance: a leading indicator of ecological  
381 transition. *Ecol Lett* 9(3):311–318
- 382 Contamin R, Ellison AM (2009) Indicators of regime shifts in ecological systems: What do  
383 we need to know and when do we need to know it? *Ecological Applications* 19(3):799–816
- 384 Dakos V, Carpenter SR, Brock WA, Ellison AM, Guttal V, Ives AR, Kéfi S, Livina V,  
385 Seekell DA, van Nes EH, Scheffer M (2012a) Methods for Detecting Early Warnings of



- 386 Critical Transitions in Time Series Illustrated Using Simulated Ecological Data. PLoS  
387 ONE 7:e41,010
- 388 Dakos V, van Nes EH, D’Odorico P, Scheffer M (2012b) Robustness of variance and  
389 autocorrelation as indicators of critical slowing down. *Ecology* 93:264–271
- 390 Dakos V, Carpenter SR, van Nes EH, Scheffer M (2015) Resilience indicators: prospects  
391 and limitations for early warnings of regime shifts. *Phil Trans B* 370:20130,263
- 392 Ditlevsen PD, Johnsen SJ (2010) Tipping points: Early warning and wishful thinking.  
393 *Geophys Res Lett* 37(19):n/a–n/a
- 394 Drake JM (2013) Early warning signals of stochastic switching. *Proceedings of the Royal  
395 Society B: Biological Sciences* 280(1766):20130,686–20130,686
- 396 Freidlin MI, Wentzell AD (2012) *Random Perturbations of Dynamical Systems*, vol 260.  
397 Springer Science & Business Media
- 398 Gsell AS, Scharfenberger U, Özkundakci D, Walters A, Hansson LA, Janssen ABG, Nöges  
399 P, Reid PC, Schindler DE, Van Donk E, Dakos V, Adrian R (2016) Evaluating  
400 early-warning indicators of critical transitions in natural aquatic ecosystems. *Proc Natl  
401 Acad Sci USA* 113(50):E8089–E8095
- 402 Guttal V, Jayaprakash C (2008) Changing skewness: an early warning signal of regime  
403 shifts in ecosystems. *Ecol Lett* 11(5):450–460
- 404 Halley JM (1996) Ecology, evolution and 1/f-noise. *Trends in Ecology and Evolution*  
405 11(1):33–37
- 406 Hänggi P, Jung P (1995) Colored noise in dynamical systems. *Advances in Chemical  
407 Physics* 89:239–326
- 408 Hastings A, Wysham DB (2010) Regime shifts in ecological systems can occur with no  
409 warning. *Ecol Lett* 13(4):464–472

- 410 Held H, Kleinen T (2004) Detection of climate system bifurcations by degenerate  
411 fingerprinting. *Geophys Res Lett* 31(23):L23,207
- 412 Higham D (2001) An algorithmic introduction to numerical simulation of stochastic  
413 differential equations. *SIAM Rev* 43:525–546
- 414 Holling CS (1973) Resilience and stability of ecological systems. *Annual Review of Ecology  
415 and Systematics* 4(1):1–23
- 416 Kéfi S, Dakos V, Scheffer M, Van Nes EH, Rietkerk M (2012) Early warning signals also  
417 precede non-catastrophic transitions. *Oikos* 122(5):641–648
- 418 Kleinen T, Held H, Petschel-Held G (2003) The potential role of spectral properties in  
419 detecting thresholds in the Earth system: application to the thermohaline circulation.  
420 *Ocean Dynamics* 53(2):53–63
- 421 Kuehn C (2013) A mathematical framework for critical transitions: normal forms, variance  
422 and applications. *Journal of Nonlinear Science* 23(3):457–510
- 423 Kuehn C, Zschaler G, Gross T (2015) Early warning signs for saddle-escape transitions in  
424 complex networks. *Scientific reports* 5:13,190
- 425 Kwasniok F (2015) Forecasting critical transitions using data-driven nonstationary  
426 dynamical modeling. *Physical Review E* 92(6):062,928
- 427 Ludwig D, Jones D, Holling CS (1978) Qualitative analysis of insect outbreak systems: the  
428 spruce budworm and forest. *Journal of Animal Ecology* 47:315–332
- 429 May RM (1977) Thresholds and breakpoints in ecosystems with a multiplicity of stable  
430 states. *Nature* 269:471–477
- 431 Meisel C, Klaus A, Kuehn C, Plenz D (2015) Critical slowing down governs the transition  
432 to neuron spiking. *PLoS Computational Biology* 11(2):e1004,097

- 433 Mheen M, Dijkstra HA, Gozolchiani A, Toom M, Feng Q, Kurths J, Hernandez-Garcia E  
434 (2013) Interaction network based early warning indicators for the atlantic moc collapse.  
435 Geophysical Research Letters 40(11):2714–2719
- 436 Noy-Meir (1975) Stability of grazing systems an applicaion of predator prey graphs. J Ecol  
437 63:459–482
- 438 Perretti CT, Munch SB (2012) Regime shift indicators fail under noise levels commonly  
439 observed in ecological systems. Ecological Applications 22:1772–1779
- 440 Ripa J, Lundberg P (1996) Noise colour and the risk of population extinctions.  
441 Proceedings of the Royal Society B 263:1751–1753
- 442 Ritchie P, Sieber J (2016) Early-warning indicators for rate-induced tipping. Chaos  
443 26:093,116
- 444 Ritchie P, Sieber J (2017) Probability of noise-and rate-induced tipping. Physical Review E  
445 95(5):052,209
- 446 Rosenzweig ML (1971) Paradox of enrichment - destabilization of exploitation ecosystems  
447 in ecological time. Science 171:385–388
- 448 Rudnick DL, Davis RE (2003) Red noise and regime shifts. Deep Sea Res I 50(6):691–699
- 449 Scheffer M (2009) Critical Transitions in Nature and Society. Princeton University Press
- 450 Scheffer M, Bascompte J, Brock WA, Brovkin V, Carpenter SR, Dakos V, Held H, van Nes  
451 EH, Rietkerk M, Sugihara G (2009) Early-warning signals for critical transitions. Nature  
452 461:53–59
- 453 Schreiber S, Rudolf VH (2008) Crossing habitat boundaries: coupling dynamics of  
454 ecosystems through complex life cycles. Ecology Letters 11(6):576–587

- 455 Seekell DA, Carpenter SR, Pace ML (2011) Conditional heteroscedasticity as a leading  
456 indicator of ecological regime shifts. *Am Nat* 178(4):442–451
- 457 Sharma Y, Abbott KC, Dutta PS, Gupta AK (2015) Stochasticity and bistability in insect  
458 outbreak dynamics. *Theoretical Ecology* 8:163–174
- 459 Shea K, Roxburgh SH, Rauschert ESJ (2004) Moving from pattern to process: coexistence  
460 mechanisms under intermediate disturbance regimes. *Ecol Lett* 7(6):491–508
- 461 Strogatz S (1994) *Nonlinear Dynamics and Chaos with Applications to Physics, Biology,*  
462 *Chemistry, and Engineering.* Westview Press
- 463 Van Nes EH, Scheffer M (2007) Slow recovery from perturbations as a generic indicator of  
464 a nearby catastrophic shift. *Am Nat* 169(6):738–747
- 465 Vasseur D, Yodzis P (2004) The color of environmental noise. *Ecology* 85:1146–1152
- 466 Wissel C (1984) A universal law of the characteristic return time near thresholds.  
467 *Oecologia* 65(1):101–107
